# Supplementary material for: The ratio of adaptive to innate immune cells differs between genders and associates with improved prognosis and response to immunotherapy
Source: PubMed Central journal article supplement (PMC9901741; doi:10.1371/journal.pone.0281375), 2023-02-06

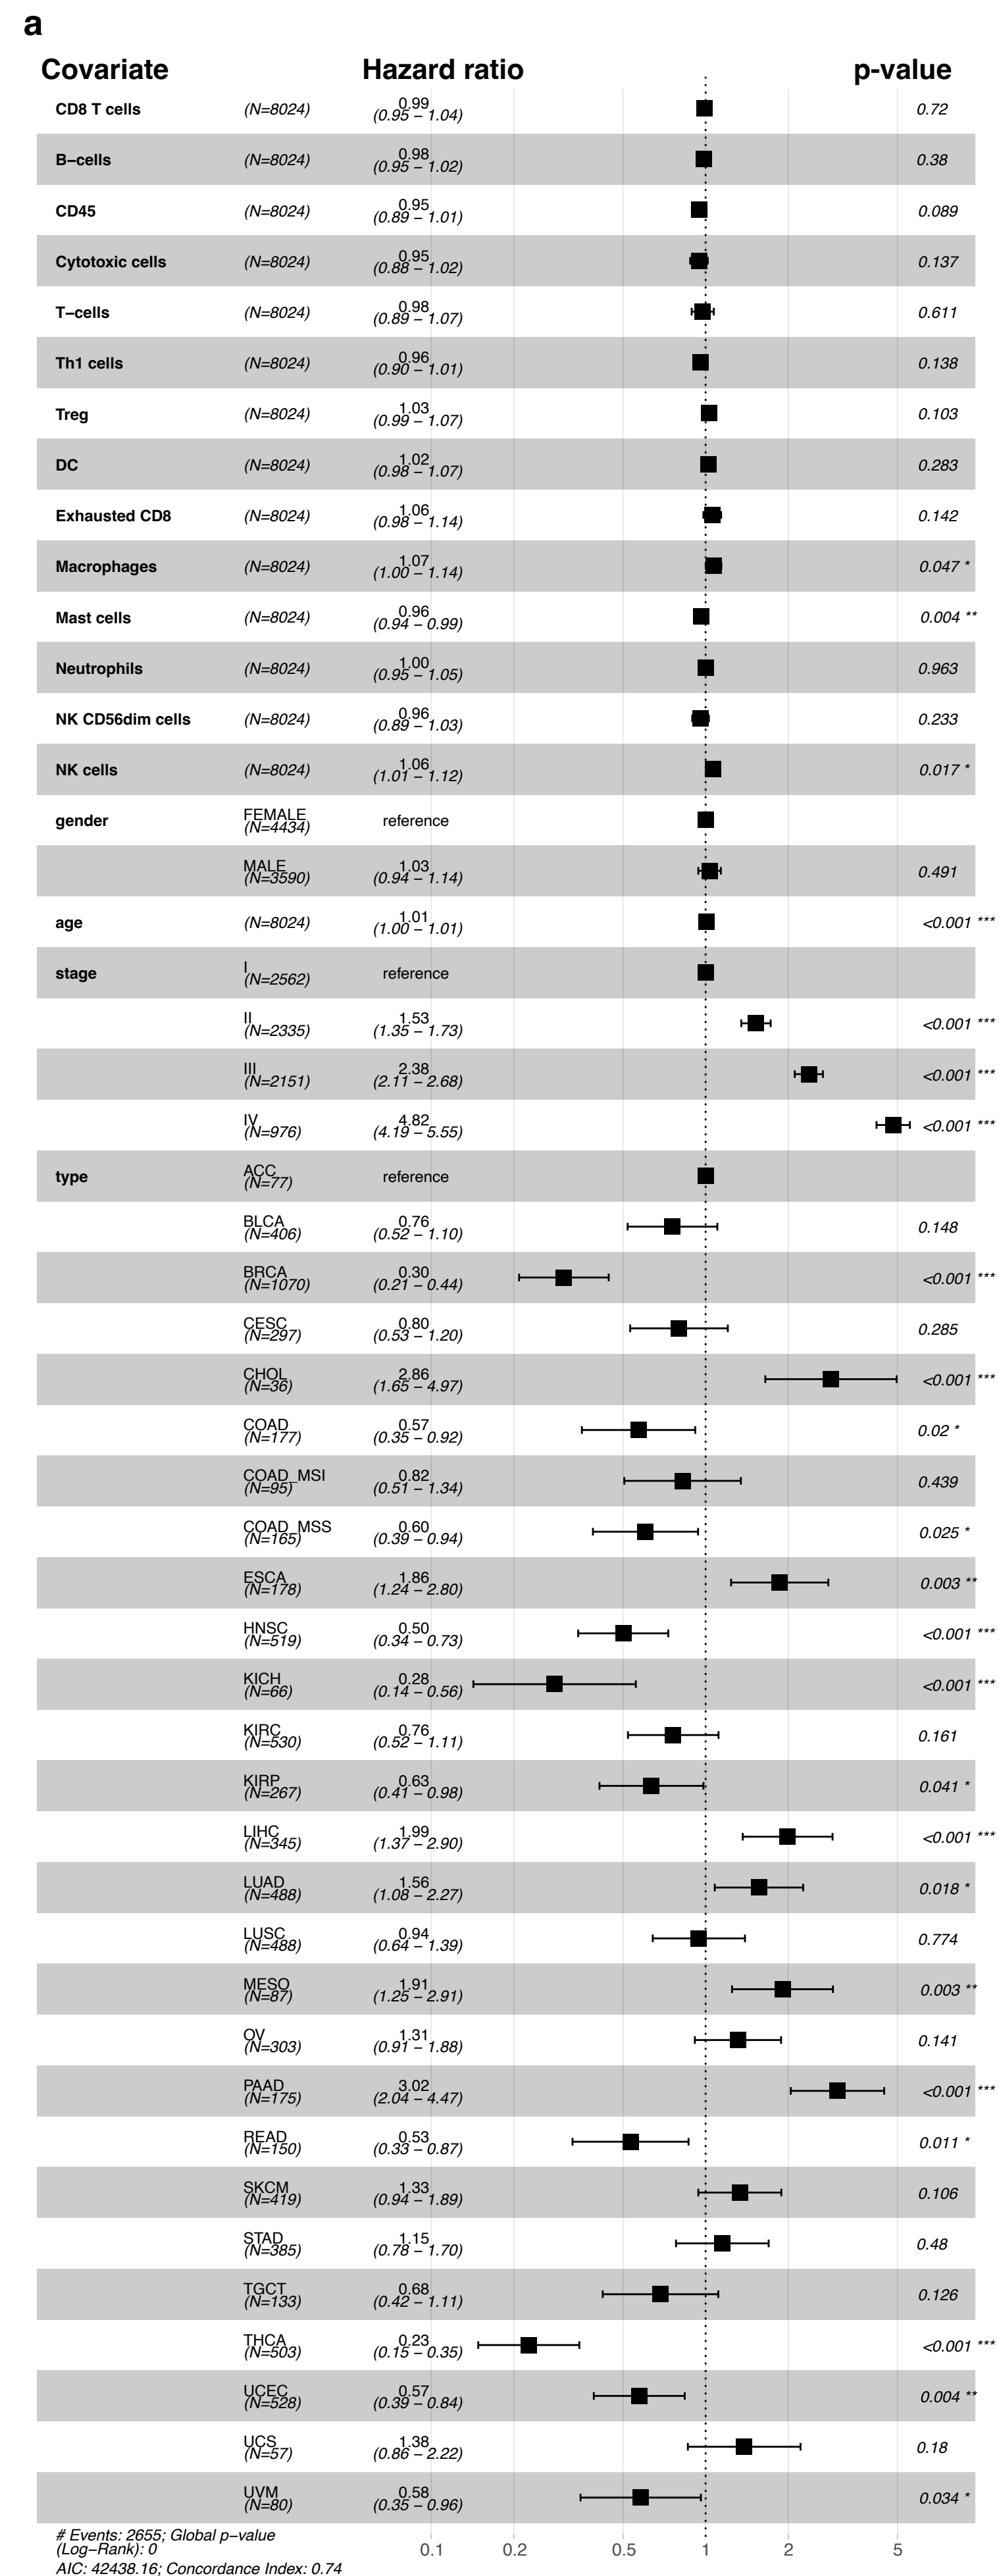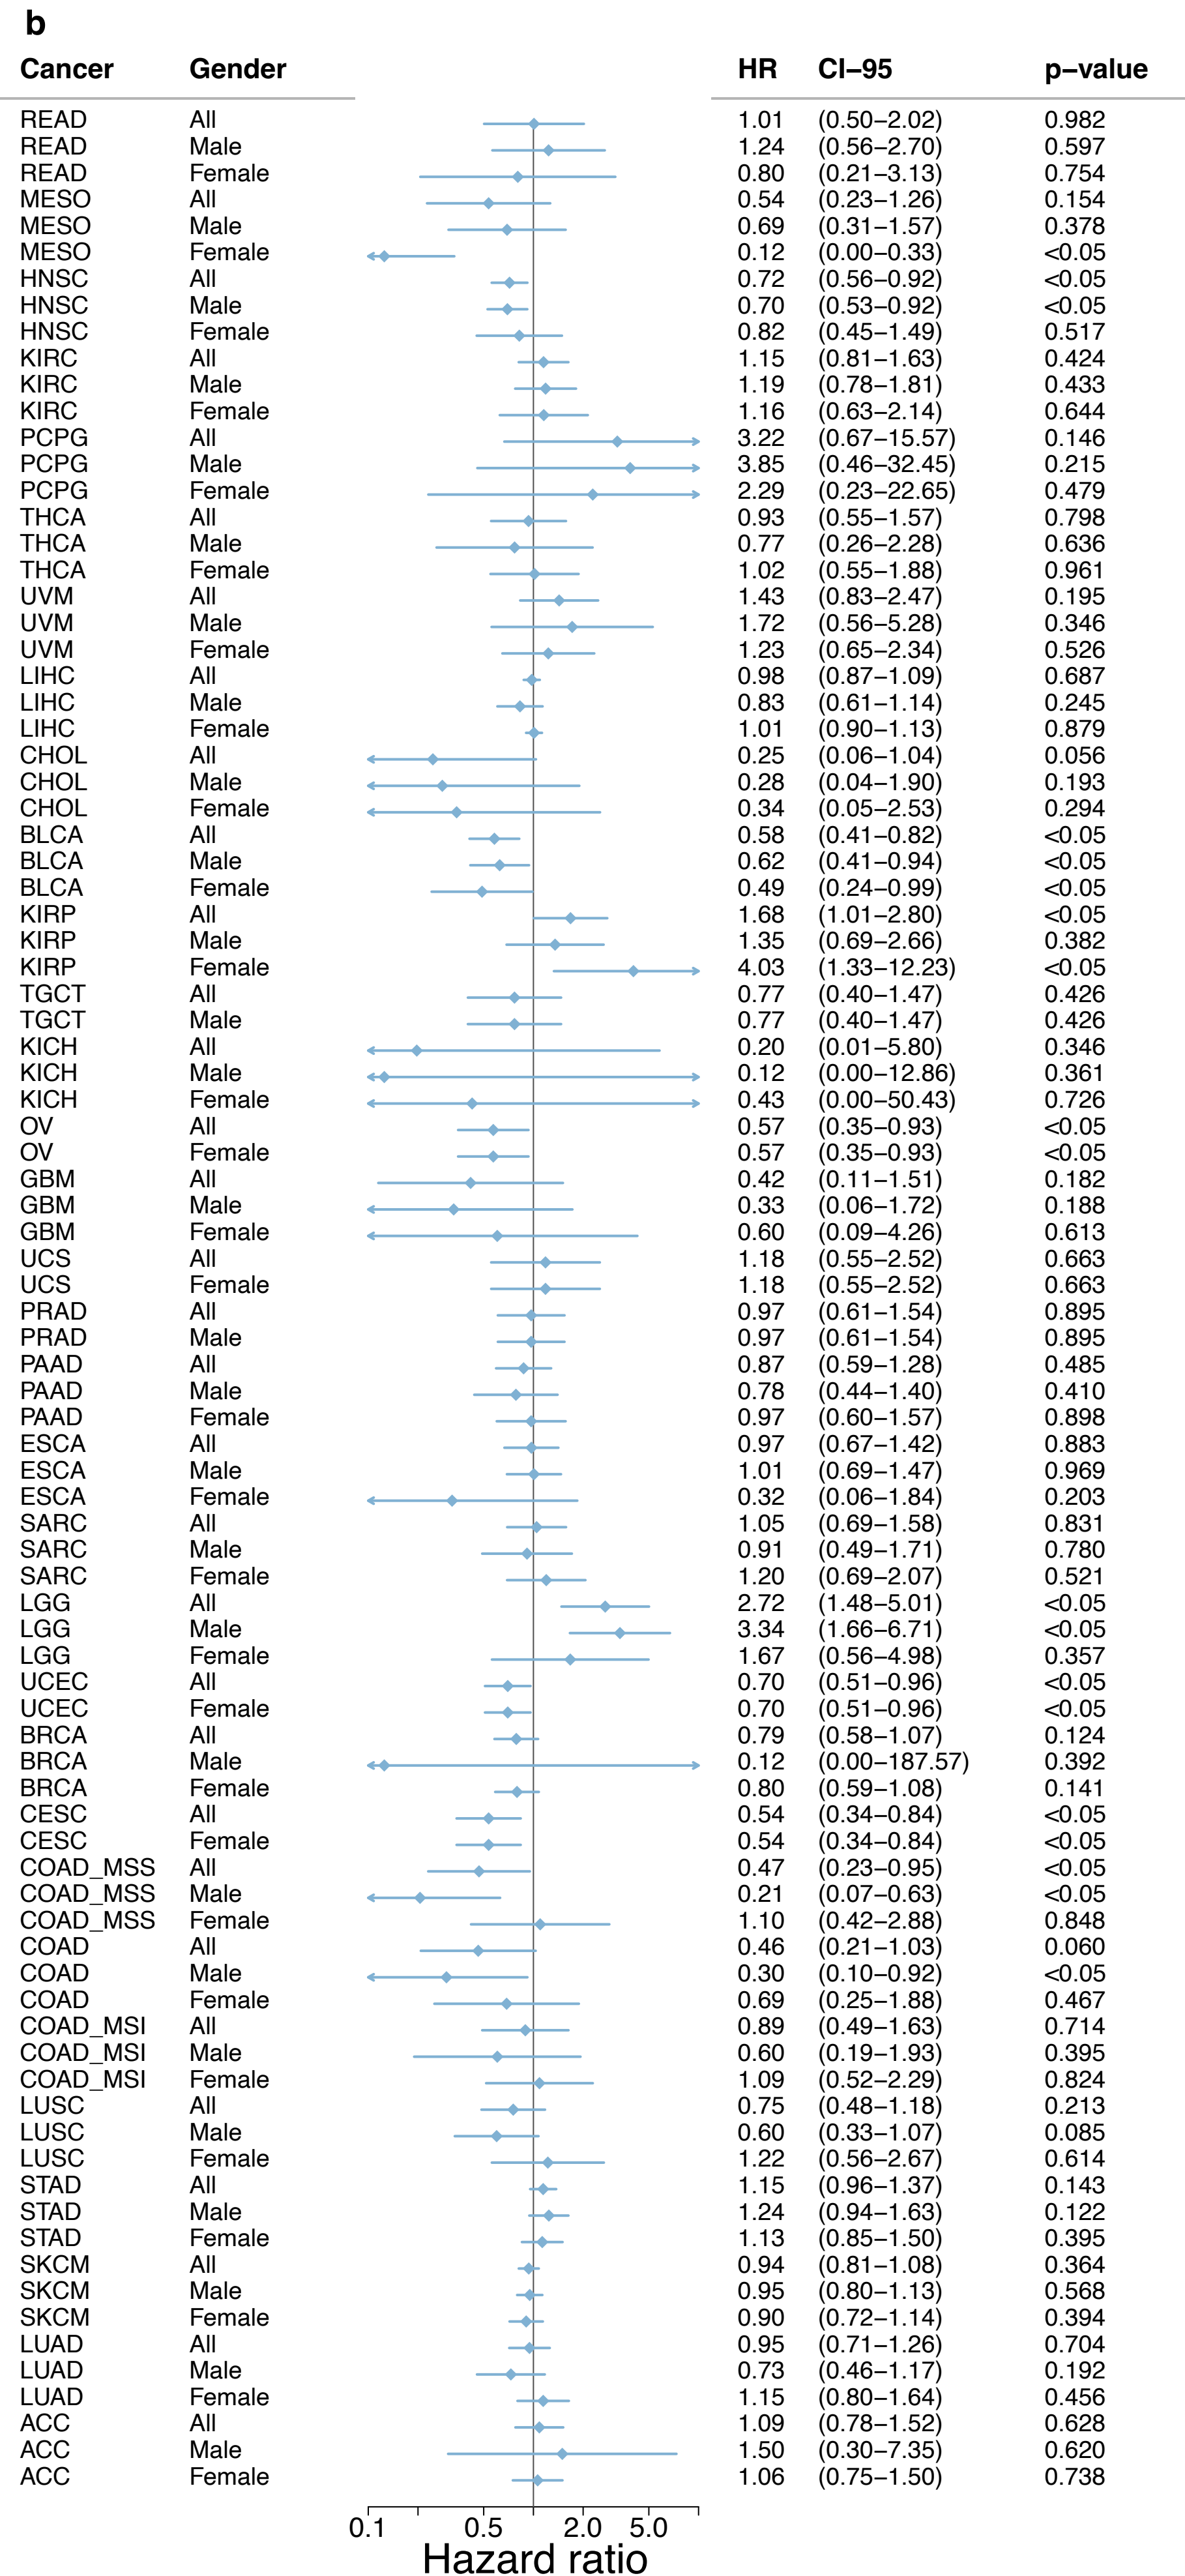

Supplement: pone.0281375.s001.pdf [file pone.0281375.s001.pdf]
