# Supplementary material for: The ratio of adaptive to innate immune cells differs between genders and associates with improved prognosis and response to immunotherapy
Source: PubMed Central journal article supplement (PMC9901741; doi:10.1371/journal.pone.0281375), 2023-02-06
Supplement: pone.0281375.s002.pdf [file pone.0281375.s002.pdf]

AI ratio

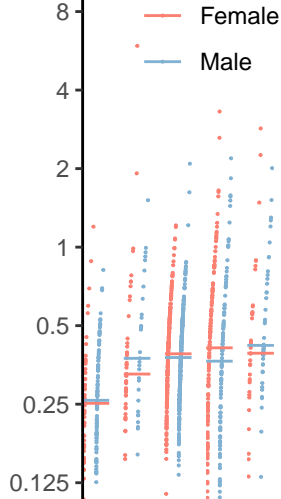

GBM  
ACC  
LGG  
SARC  
UVM  
UCS  
PCPG  
OV  
KIRP  
LIHC  
BLCA  
MESO  
KICH  
LUSC  
CHOL  
PAAD  
LUAD  
ESCA  
HNSC  
SKCM  
COAD\_MSI  
KIRC  
READ  
COAD  
THCA  
TGCT  
COAD\_MSS  
BRCA  
UCEC  
STAD  
CESC  
PRAD
